1 **Developing a context-relevant psychosocial stimulation intervention to promote**  
2 **cognitive development of children with severe acute malnutrition in Mwanza,**  
3 **Tanzania**

4  
5 C. L. Jensen, MSc<sup>1\*</sup>; E. Sanga, PhD<sup>2\*</sup>; H. Kitt, MSc<sup>3</sup>; G. PrayGod, PhD<sup>2</sup>; H. Kunzi, MSc<sup>2</sup>; T.  
6 Setebe, MSc<sup>2</sup>; S. Filteau, PhD<sup>4</sup>; J. Webster, PhD<sup>5</sup>; M. Gladstone, PhD<sup>3\*</sup> and M. F. Olsen, PhD<sup>1,6\*</sup>

7 <sup>1</sup> Department of Nutrition, Exercise and Sports, University of Copenhagen, Copenhagen, Denmark

8 <sup>2</sup> National Institute for Medical Research, Mwanza Centre, Mwanza, Tanzania

9 <sup>3</sup> Department of Women and Children's Health, Institute of Life Course and Medical Sciences, University of Liverpool,  
10 Liverpool, United Kingdom

11 <sup>4</sup> Faculty of Epidemiology and Population Health, London School of Hygiene and Tropical Medicine

12 <sup>5</sup> Faculty of Infectious and Tropical Diseases, London School of Hygiene and Tropical Medicine

13 <sup>6</sup> Department of Infectious Diseases, Rigshospitalet, Copenhagen, Denmark

14

15 \*These authors contributed equally to this work

16

17 **Corresponding author:**

18 Mette Frahm Olsen, MSc, PhD, Associate Professor,

19 Department of Infectious Diseases, Rigshospitalet

20 Esther Møllers Vej 6, building 86, 3rd floor, 2100 Copenhagen Ø, Denmark

21

22

23 **Key findings**

24

25 • Financial insecurity, competing time constraints, lack of awareness and poor father  
26 involvement are all barriers highlighted by families with children who have severe acute  
27 malnutrition (SAM) as negatively impacting their ability to promote nurturing care and  
28 child development.

29 • Despite knowledge of the importance of good health and adequate nutrition as important  
30 contributors to child development, caregivers of children with SAM did not always have  
31 the resources to support this.

32 • Caregivers interviewed were less familiar with the importance of responsive caregiving and  
33 opportunities for early learning as ways to support children's development.

34 • A context-relevant programme to support psychosocial development among young children  
35 treated for SAM should include clear linkages with community-based support after  
36 discharge, but also approaches to promote involvement of fathers in childcare, and  
37 counselling of caregivers on low-cost strategies to improve nutrition and development.

38 • Other supporting social welfare initiatives in the community are needed to address the  
39 broader structural issues identified in this study.

41 **Abstract**

42 More than 250 million children will not meet their developmental potential due to poverty and  
43 malnutrition. Psychosocial stimulation (PS) has shown promising effects for improving development  
44 in children exposed to severe acute malnutrition (SAM) but programs are rarely implemented. In this  
45 study, we used qualitative methods to inform the development of a PS programme to be integrated  
46 with SAM treatment in Mwanza, Tanzania. We conducted in-depth interviews with seven caregivers  
47 of children recently treated for SAM and nine professionals in early child development. We used  
48 thematic content analysis and group feedback sessions and organised our results within the Nurturing  
49 Care Framework. Common barriers to stimulate child development included financial and food  
50 insecurity, competing time demands, low awareness about importance of responsive caregiving and  
51 stimulating environment, poor father involvement, and gender inequality. Caregivers and  
52 professionals suggested that community-based support after SAM treatment and counselling on PS  
53 would be helpful, e.g. how to create homemade toys and stimulate through involvement in everyday  
54 chores. Based on the findings of this study we developed a context-relevant PS programme. Some  
55 issues identified were structural highlighting the need for programmes to be linked with broader  
56 supportive initiatives.

57

58

59

## 60 **Introduction**

61 More than 250 million children below 5 years do not reach their full developmental potential, mainly  
62 due to poverty and malnutrition (Black *et al.*, 2017). Most of these children live in low- and middle-  
63 income countries with the highest prevalence found in sub-Saharan Africa (Black *et al.*, 2017).  
64 Malnutrition is common in these settings and research has demonstrated that both chronic and acute  
65 malnutrition impair cognitive and motor development (Abessa *et al.*, 2017; Sudfeld *et al.*, 2015; van  
66 den Heuvel *et al.*, 2017). This results in long-term consequences for child development and future  
67 life opportunities, as developmental delays track into later childhood and adulthood (Kirolos *et al.*,  
68 2022).

69  
70 Jamaican studies from the 1970s showed that psychosocial stimulation (PS) of malnourished children  
71 can improve child development (Grantham-McGregor *et al.*, 1980; Grantham-McGregor *et al.*, 1987).  
72 These studies demonstrated for the first time, that weekly PS improve developmental outcomes in  
73 children with severe acute malnutrition (SAM) more than nutritional therapy on its own. More recent  
74 studies have confirmed beneficial effects of PS in SAM (Abessa *et al.*, 2019; Nahar *et al.*, 2012). In  
75 addition, programmes in community settings have shown that caregiver support through PS  
76 programmes can improve child development and cognition at two years of age (Hamadani *et al.*,  
77 2019; Yousafzai *et al.*, 2014) – although some, when integrated into routine government programmes,  
78 have shown less benefit (Jeong *et al.*, 2021).

79  
80 Based on the early studies in Jamaica, WHO guidelines for inpatient treatment of SAM have included  
81 recommendations on PS for the past two decades (Ashworth *et al.*, 2003). However, PS activities are  
82 rarely implemented in inpatient treatment and still not mentioned in guidelines for community  
83 management of SAM (Bahwere *et al.*, 2006). More recently, the Nurturing Care Framework (NCF)  
84 was created by international agencies (WHO *et al.*, 2018) as a framework of actionable strategies to  
85 improve early child development (ECD). The NCF describes five components of nurturing care

86 needed for children to reach their full developmental potential: good health, adequate nutrition,  
87 responsive caregiving, opportunities for early learning, and security and safety (WHO *et al.*, 2018).  
88 Programmes have been created to support parents in providing PS, including the Care for Child  
89 Development intervention package (WHO & UNICEF, 2012). However, these programs are rarely  
90 implemented in management of SAM, despite children being one of the most high-risk groups.

91  
92 The lack of PS activities in SAM management is likely due to resource-constraints, such as training  
93 of staff and supervision (Cavallera *et al.*, 2019). We still do not have good evidence as to what factors  
94 may facilitate effective implementation of PS programmes for this vulnerable group (Daniel *et al.*,  
95 2017; Jeong *et al.*, 2021; Mehrin *et al.*, 2022). To understand better strategies for implementation and  
96 facilitate scale-up, it is crucial to gain the insight of caregivers and professionals who work with SAM  
97 and ECD (Mehrin *et al.*, 2021; Richter *et al.*, 2017). In this study in Mwanza, Tanzania, we aimed to  
98 1) explore barriers and facilitators in promoting PS of children treated for SAM, and 2) to explore  
99 perceptions of caregivers and professionals and their suggestions as how best to design a context-  
100 specific PS package to be integrated with SAM treatment.

101

## 102 **Methods**

### 103 **Study design and setting**

104 With a long-term plan of conducting a factorial trial to test the effects of improved nutritional and PS  
105 interventions in the management of malnutrition, we conducted the ‘BrightSAM (Brain development,  
106 growth and health in children with SAM) trial development study’ between June 2020 – February  
107 2022. The overall aim was to develop, pilot test and assess acceptability and implementation  
108 feasibility of the nutrition and PS interventions to be integrated with SAM management. In the present  
109 paper, we report findings of qualitative formative research we conducted to develop the content and  
110 delivery mode of the PS intervention.

111 The findings of this formative research informed the development of a PS program that was integrated  
112 with SAM management in a pilot study at BMC. The results on impact on child development  
113 outcomes and a process evaluation of the contextual factors influencing intervention delivery and  
114 uptake will be reported separately.

115

116 The study was conducted at the National Institute for Medical Research (NIMR), the Bugando  
117 Medical Centre (BMC) tertiary care referral hospital and the Tanzanian Home Economics  
118 Association (TAHEA) in Mwanza, Tanzania. Mwanza is located on the shore of Lake Victoria with  
119 a population of about 1,182,000 in 2021 (Population Stat, 2022). Main economic activities in the  
120 region are agriculture, livestock keeping and fishing. The prevalence of stunting in Mwanza region  
121 is 39%, just above the country average of 34%. Among women in the region, 46% have completed  
122 primary school, 23% attended or completed secondary school or higher education, and female literacy  
123 rates are approximately 77% (Ministry of Health *et al.*, 2016). The nutrition unit at the BMC  
124 paediatric department manages cases of SAM with complications. The unit provides specialized care  
125 and feeding by nurses and a paediatrician. Staff also includes a nutritionist, a social worker and a  
126 physiotherapist. Conditions such as sickle cell disease, cerebral palsy and congenital heart diseases  
127 are common among malnourished children (Ahmed *et al.*, 2016). Outpatient follow-up clinics for  
128 malnutrition cases are supervised by a paediatrician and a nurse.

129

### 130 **Participant selection and data collection**

131 Data were collected using in-depth interviews (Guest *et al.*, 2013). Caregivers of children, who had  
132 recently been admitted with SAM and were receiving outpatient follow-up, were selected by  
133 purposive sampling (Campbell *et al.*, 2020). Sampling was done with assistance from healthcare staff  
134 at the nutrition unit. Caregivers were contacted via phone and invited to BMC or NIMR for  
135 interviews. Additionally, in-depth interviews were conducted with professionals from the BMC  
136 nutrition unit or NGOs working to promote child development in the community. The interviews with

137 professionals were conducted at their workplaces or community centres. Data triangulation was  
138 achieved by interviewing both caregivers of children treated for SAM and professionals working with  
139 SAM and ECD.

140

141 All interviews were conducted between June-September 2020 and took place in quiet, private  
142 environments. They were conducted in Kiswahili by three trained, experienced research scientists  
143 from NIMR and lasted 45-60 minutes. Interviews explored awareness and attitudes towards ECD and  
144 PS. The interview guides focused on contextual factors that may be barriers or facilitators to  
145 supporting the learning and development of a child, as well as current support for ECD in Mwanza.  
146 Finally, we gained specific views and suggestions on how a short, focused PS intervention could be  
147 designed to improve cognitive development of children during treatment for SAM. Interview guides  
148 were pretested and revised to expand probes for deeper exploration as needed. The number of  
149 interviews was based on an assessment of data saturation, when no new ideas or themes emerged in  
150 interviews (Fusch & Ness, 2015; Saunders *et al.*, 2018).

151

152 After preliminary data analysis, respondents were invited to a feedback session involving further  
153 discussions through which they were able to clarify or elaborate on views and suggestions from the  
154 interviews. One group discussion was conducted for the caregivers and another for the professionals.  
155 The sessions took 60-90 minutes and were both hosted at NIMR. These sessions were not intended  
156 to add new data for analysis but aimed to validate data obtained from the in-depth interviews to ensure  
157 correct understanding and to feed-back study findings to participants (Ramanadhan *et al.*, 2021).

158

### 159 **Data management and analysis**

160 The interviews were digitally recorded, transcribed verbatim in Kiswahili and translated into English  
161 by research assistants at NIMR fluent in both Kiswahili and English. Transcriptions and translations  
162 were cross-checked and verified by two authors (ES and GP), fluent in both languages. Transcripts

163 were coded following principles of thematic content analysis (Gale *et al.*, 2013) using Dedoose  
164 software (version 8.3.35, SocioCultural Research Consultants, Los Angeles, US). First, an initial  
165 analytical coding framework was developed deductively by the research team based on previous  
166 literature, assumptions and the interview guide. All codes were structured into a codebook with  
167 descriptions for each. Then, the first transcript was coded independently by each of the three coders  
168 (ES, CJ, HK) and then cross-checked and reviewed by the team to ensure that a similar  
169 conceptualisation of framework and codes was used by all coders. Once this preliminary coding was  
170 completed, the primary coding framework was created. New codes were created inductively and  
171 added to the framework during the following analyses and data familiarisation. Multiple codes were  
172 applied to a section of text when appropriate. The remaining transcripts were coded by the coding  
173 team and verified by JW, MG and MFO.

174

175 Identified barriers and facilitators which emerged from the thematic content analysis were organised  
176 and synthesised using the NCF. This framework was selected for its consideration of the different  
177 components of care that support caregivers and young children with their development. The barriers  
178 and facilitators were examined and linked with one or more of the five NCF components: good health,  
179 adequate nutrition, responsive caregiving, opportunities for early learning, and security and safety  
180 (WHO *et al.*, 2018). Based on this analysis, we report suggestions and opportunities for a PS  
181 intervention to improve nurturing care and ECD for children recovering from SAM.

182

### 183 **Ethical Considerations**

184 The study received ethical clearance from the Medical Research Coordinating Committee of the  
185 National Institute of Medical Research - Dar es Salaam, Tanzania (Ref- NIMR/HQ/R.8c/Vol.I/1708),  
186 and from the ethics committee of the London School of Hygiene and Tropical Medicine (Ref: 17831-  
187 1). Written informed consent was obtained prior to starting interviews with all caregivers and



188 professionals. All quotes are used anonymously and without descriptive information that could lead  
189 to identification of respondents.

190

## 191 **Results**

### 192 **Interviewee characteristics**

193 A total of sixteen interviews were conducted. Seven included caregivers (all mothers) of children  
194 recently treated for SAM. The majority of caregivers had completed primary or secondary school and  
195 were working as small-scale farmers or vendors. The children were between 6 months and 5 years of  
196 age, and about half were girls. Most families lived within 10 km from BMC. Nine interviews were  
197 conducted with local professionals working at the BMC nutrition unit or at ECD-related NGOs.  
198 Professionals included health care workers, nutritionists, and NGO staff. All professionals had more  
199 than five years of work experience.

200

### 201 **Barriers and facilitators for providing PS support**

202

#### 203 ***Good health: the fundamentals of child development***

204 Caregivers and professionals described how illness negatively impacts on children's growth and  
205 ability to learn and should therefore be addressed as a primary focus in any programme to support  
206 child development. One mother described how she could see the impact of illness on her child's  
207 development, with similar messages emerging from professionals.

208

209 *“Before falling into sickness, she was so active. She was able to walk around holding objects like*  
210 *tables, chairs. But after falling into sickness, everything stopped (...) sickness may slow down the*  
211 *normal growth of a child”* (Mother 7).

212

213 *“If a child is frequently under infections (...) he will be late to walk, communicate and talk”*  
214 (Professional 2).

215

216 The health of caregivers is also vital. One professional highlighted how keeping the caregivers’  
217 wellbeing in mind is fundamental as they often have other concerns which make it difficult to take in  
218 new messages.

219

220 *“We forget the caregiver’s wellbeing, (...) TAHEA comes - they want to train in nutrition or child*  
221 *safety and so on, (...) sometimes they (the caregivers) don’t listen because they have other problems*  
222 *in mind”* (Professional 6).

223

224 Professionals described how increased support of children’s health after discharge from the nutrition  
225 unit would be beneficial, in particular by strengthening existing links between the nutrition unit and  
226 the community workers.

227

228 *“Community health workers should be trained and become knowledgeable, because us from here*  
229 *(BMC) we cannot go there always, we need them, they should be assisting in follow-up”* (Professional  
230 2).

231

### 232 ***Ensuring adequate nutrition and resources at home***

233 Inadequate nutrition was clearly perceived by caregivers as a vital barrier for learning and  
234 development of their children.

235

236 *“If the baby doesn’t eat well - probably he cannot grow well, most of these children they are not*  
237 *active (...) because even for an adult who doesn’t eat, he or she cannot be active - what about a little*  
238 *child (...) eating well is important for child development”* (Mother 7).

239

240 Professionals also mentioned adequate nutrition when asked about the foundation for growth and  
241 development.

242

243 *“Good nutrition, because he can have all good environment and he is well stimulated, but that won’t*  
244 *be enough if he doesn’t have services like nutrition”* (Professional 5).

245

246 Poverty was clearly perceived by both caregivers and professionals as a main barrier for the  
247 availability of nutritious food – and as such, a fundamental barrier that cannot easily be addressed by  
248 counselling or behaviour change interventions. Mothers demonstrated good awareness of the  
249 importance of nutrition and thus experienced the agony of knowing how to feed their child, but not  
250 having the resources to do so.

251

252 *“You can think of buying the required food for the child, but you find yourself with no money to buy*  
253 *(...) you love your children and wish to buy them everything good for their development, but due to*  
254 *the poor economic status you have no choice”* (Mother 1).

255

256 Professional described the poor socio-economic and educational status of the families of children  
257 with SAM and emphasized the importance of cooking demonstrations on how to prepare nutritious  
258 low-cost meals with locally available foods.

259

260 *“It’s like a mind-set where one knows that to eat well it has to be expensive, (...) we are telling them*  
261 *to bring foods that can be found within their environment and we use those foods to cook a meal that*  
262 *contain five groups of nutrients, (...) so after you have cooked and prepared a balanced meal, they*  
263 *will say ooh so it’s possible”* (Professional 7).

264

265 However, one mother highlighted how the time demand for her income-generating activities resulted  
266 in little time for her to keep an eye on her child's diet, even to a point that led her child to become  
267 malnourished.

268

269 *"I was busy with work, actually that is what costed me, because the child was most of the time with*  
270 *the house girl, I had no time to check her diet, then she fell sick, then I was told it was malnutrition.*  
271 *I had to stop my work but it was too late"* (Mother 5).

272

### 273 ***Enabling responsive caregiving through the wider circle of care***

274 Professionals consistently described the importance of having multiple caregivers to support the child  
275 and family. This was seen as pivotal for good child-caregiver interactions.

276

277 *"When you find a family which is extended - I mean maybe if there is father, uncle, and others, there*  
278 *is grandmother, those children are so different and their learning and development is very good*  
279 *because they have people to interact and play with"* (Professional 4).

280

281 Some professionals highlighted how other caregivers (siblings or housekeepers), who take care of  
282 children due to the competing demands on the mother, may be lacking in their ability to provide  
283 responsive caregiving.

284

285 *"The mother is busy, a child is raised with a house girl. If the house girl is quiet, a child will learn to*  
286 *be quiet, if she does not get the opportunity to play with other people who can stimulate her"*  
287 (Professional 2).

288

289 Gender inequities and expectations of gender roles was raised by interviewees as a barrier for  
290 responsive caregiving. It was highlighted that society expects mothers to take care of the children

291 whereas fathers are expected to bring money for the household. It emerged from our interviews, that  
292 these societal norms may lead to lack of involvement of fathers as they are expected to have other  
293 responsibilities and spend little time caregiving.

294

295 *“A father goes to work at 6 am and return home at 11 at night, what time will he play with his child?  
296 A child has already gone to bed, he doesn’t have time”* (Mother 2).

297

298 Some professionals highlighted their desire to involve fathers and suggested ways to reach fathers  
299 through community programmes.

300

301 *“When you go home you will find mothers alone and fathers are not around. So we thought, how can  
302 we access fathers (...). They are counselled where they are working or using their time (...), our  
303 counsellors are reporting that they are getting support from men, they are allowed for like twenty  
304 minutes while people are taking their coffee while listening to talks about care for child development”  
305* (Professional 5).

306

307 Other professionals primarily blamed lack of awareness for insufficient responsive caregiving.

308

309 *“When it comes to playing with a child and understanding a child’s feelings, I don’t think social  
310 economics plays a role, I think it’s only knowledge (...) To smile for a child doesn’t need money”  
311* (Professional 7).

312

### 313 ***Awareness and prioritisation of play and opportunities for early learning***

314 Professionals and caregivers that we interviewed highlighted how crucial it is to provide young  
315 children opportunities to interact and stimulate their senses.

316

317 *“I teach him different things. I play with him, when I get time, I really try my best, even though*  
318 *household chores are all on me”* (Mother 4).

319

320 However, professionals also expressed how a lack of awareness of the importance of play leads to  
321 lack of prioritisation. A professional described how some caregivers might prioritise cleanliness over  
322 social stimulation. Similarly, a mother highlighted lack of understanding as a barrier to PS.

323

324 *“Some kids, their parents stop them from playing with other children, this child then stops playing*  
325 *with others. Parents might think that if the child plays with others, they become dirty not knowing*  
326 *their children’s cognitive development remains stunted as children learn mostly through games”*  
327 (Professional 8).

328

329 *“I think education matters. Some mothers have not gone to school, she just gave birth to a child - she*  
330 *doesn’t know about playing with a child, maybe she thinks it’s waste of time. I think education should*  
331 *be expanded even in our community”* (Mother 3).

332

333 Clearly, time constraints and competing responsibilities may act as barriers towards stimulating the  
334 child through play and interaction.

335

336 *“There are some mothers who are vendors, they leave home at 6 am with bucket of tomatoes. She*  
337 *spends a whole day at the market selling tomatoes, when will she play with a child? I have time*  
338 *because I’m a housewife”* (Mother 6).

339

340 Professionals suggested ways to promote PS, even in busy families, by integrating it into everyday  
341 activities. They gave examples on how to be creative in making toys and stimulate children without  
342 need for money.

343

344 *“When the mother performs her duties, does not leave the child, and when she is doing laundry, she*  
345 *tells her child that ‘my child, this is how we do laundry’, so the child knows that when I do this, it is*  
346 *called washing”* (Professional 9).

347

348 *“If it is a ball, we look for rags or old clothes, make a ball and tie it properly with rope (...). If it is*  
349 *things that make sounds, we will pick gravel, rocks, they will use the rocks to hit on the soda caps, it*  
350 *makes sounds and a child can play with it”* (Professional 8).

351

### 352 ***Issues of security and safety***

353 A young child’s development is vulnerable to physical and psychological stress. In our interviews,  
354 although there was limited discussion on this topic, one professional exemplified that stress can  
355 impair development and precautions should be taken to ensure the safety of the child.

356

357 *“Another dangerous factor is what we call violent homes, here I mean where at home there is no*  
358 *peace, the parents are fighting and quarrelling and even other relatives, it’s very dangerous for the*  
359 *child’s development”* (Professional 5).

360

361 *“You have to observe his safety. There should be playing materials, so you have to ensure there*  
362 *shouldn’t be dangerous objects around. You make sure that environment is safe for a child to learn*  
363 *by himself playing”* (Professional 5).

364

### 365 ***In summary***

366 The factors identified in our interviews include issues that can be addressed by taking a holistic view  
367 to creating a PS programme for children treated for SAM, while other factors are more structural in  
368 nature and require broader societal initiatives. We have summarised the findings of barriers,

369 suggestions and recommendations identified through our interviews with caregivers and  
370 professionals and connected these to the NCF components (Figure 1).

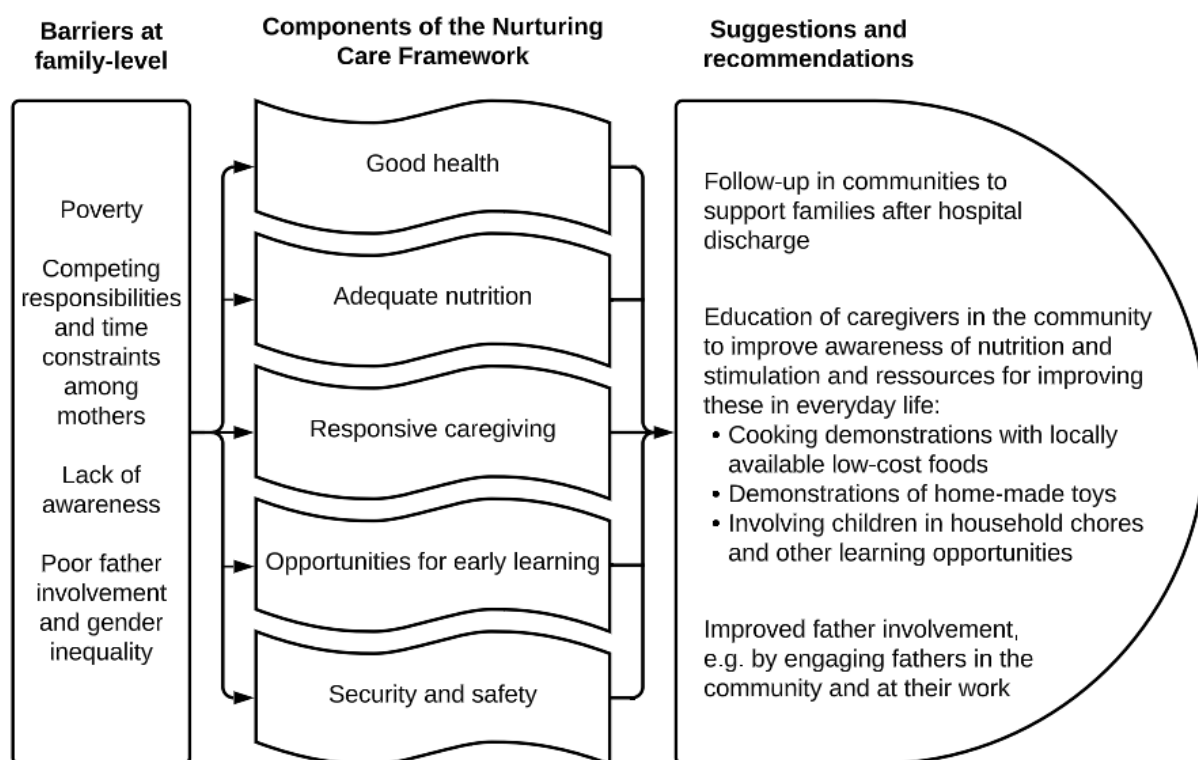

371

372 **Figure 1:** Overview of identified barriers within the family considered to affect nurturing care, and suggestions and  
373 recommendations on how to support nurturing care and subsequent learning and development.

374

## 375 **Discussion**

376 This study explored factors to be considered when creating a relevant PS programme for children  
377 treated for SAM in a in Tanzanian context. Our results demonstrate social, environment and familial  
378 factors that caregivers and professionals believe may influence good nurturing care and which need  
379 to be reflected in a programme that could be helpful to families. The findings highlight a number of  
380 issues which may inhibit adoption of the five components of the NCF if not considered. These include  
381 financial and food insecurity, competing time constraints of caregivers, lack of awareness of the  
382 importance of responsive caregiving, play and stimulating activities, and finally, issues of security  
383 and safety of children.

384



385 Our interviews emphasise how caregivers and professionals are already cognisant of the two NCF  
386 components: good health and nutrition, required to meet a child’s developmental potential, but  
387 barriers within society or their economy make it difficult for families to support children (Ijaz &  
388 Rubino, 2012). Professionals also emphasised the importance of caregiver wellbeing to enable them  
389 to provide supportive care for their children (WHO *et al.*, 2018). On the other hand, caregivers we  
390 interviewed focussed less on the other NCF components: responsive caregiving and opportunities for  
391 early learning, which seemed to be less familiar ways of improving children’s development. Another  
392 component that was highlighted less in our interviews, was the importance of security and safety.  
393 This may need emphasising in counselling on PS support for improving children’s developmental  
394 outcomes - however we did not probe specifically into this area and how best to emphasise this might  
395 need more consideration.

396

397 In this study, we found that poverty and financial insecurity were commonly identified as barriers to  
398 provide key components of nurturing care; including adequate nutrition and opportunities for early  
399 learning. Mothers are generally knowledgeable on what constitutes good nutritional support for  
400 children, but many families have limited resources to act on this knowledge. Some professionals  
401 interviewed suggested that cooking demonstrations might improve understanding of how to provide  
402 better nutrition at a low cost from available ingredients. Professionals also suggested that educating  
403 mothers in low- and no-cost strategies for creating opportunities for early learning, would be possible.  
404 This includes encouraging families to make home-made toys from available materials and engaging  
405 children in household activities as a form of play. These suggestions were found relevant to our  
406 context in Tanzania and are likely to be generalizable broadly across low-income settings (Gelli *et*  
407 *al.*, 2018; Grantham-McGregor *et al.*, 1987). However, the evident impact of poverty, particularly  
408 among families who bring their children into a nutrition unit, underlines a need for additional support  
409 through cash transfer programmes, social welfare systems, or similar – some of which have  
410 demonstrated evidence of improving child development (Attanasio *et al.*, 2014; Evans *et al.*, 2019).

411 It is widely documented that poverty has a multi-faceted and detrimental effect on child development  
412 (Fernald & Gunnar, 2009; Fernald *et al.*, 2011) and we acknowledge the fundamental need for these  
413 broader issues to be addressed through structural changes, although these lie beyond the scope of our  
414 present programme.

415

416 Gender norms in the study setting may mean that women are responsible for household duties  
417 including raising children and men expected to be key earners (Feinstein *et al.*, 2010). Our  
418 interviewees projected responsibility for responsive caregiving on mothers and rarely mentioned  
419 other people within the circle of care. Many mothers who we interviewed described feelings of being  
420 overwhelmed and lacking time for additional activities. This may be common across the globe.  
421 Analysis of the UNICEF multiple indicator cluster surveys found that, across 38 low-income  
422 countries, 48% of fathers did not engage in any stimulation activities with their child (Jeong *et al.*,  
423 2016). Furthermore, a recent meta-analysis of 102 interventions to improve ECD outcomes found  
424 only 7% involved fathers in the intervention and only one study assessed paternal stimulation  
425 outcomes directly (Jeong *et al.*, 2021). To shift this, it is likely that programmes would need to address  
426 cultural expectations of a father's role as well as the wider community's (including men's)  
427 understanding of the importance of responsive caregiving for children's brain development. It is our  
428 recommendation that this be considered in future programmes within community settings.

429

430 Many mothers of children suffering from acute malnutrition in the Mwanza region have no or low  
431 level of education (Ahmed *et al.*, 2016). Studies have demonstrated that maternal schooling is  
432 strongly associated with nutritional outcomes of their children and that maternal knowledge regarding  
433 causes of malnutrition is a strong predictive factor of childhood stunting (Ahmed *et al.*, 2016; Hasan  
434 *et al.*, 2016). It is widely reported that maternal schooling has a strong positive effect on child  
435 development (Cuartas, 2021). Whilst the majority of these studies are from high income settings, a  
436 recent study in Uganda found that for each additional year of maternal education, the child's ECD

437 index score rose by 0.12 increments, which translated into effects on ability to read, identify letters  
438 and numbers at age 3-4 years (Cuartas, 2021). This suggests that not only educational interventions  
439 to improve maternal knowledge of PS and nutrition could prove effective for children suffering from  
440 SAM in rural Tanzania, but more so, supporting girls to remain in school, might also be fundamental.  
441 Clearly approaches to improve ECD should holistically encompass the needs of families, healthcare  
442 staff and communities and consider the wider structural and social determinants of health. This is  
443 complex and will require working with ministries and agencies who may be able to support this on a  
444 wider scale. Although these aspects are not addressed further within our specific programme in the  
445 nutrition unit, we hope that by continuing to highlight them, we can advocate for programmes which  
446 start early with support for young girls and women to stay in education.

447

448 Suggestions from caregivers and professionals on how to overcome some of the barriers highlighted  
449 included recommendations that could be implemented into a short, focussed intervention during  
450 management of SAM. These included better linkage with community workers on discharge from the  
451 nutrition unit and continued education of caregivers to improve knowledge of both nutrition and PS.  
452 Professionals provided specific recommendations on ways to provide advice to caregivers which  
453 could be used in everyday scenarios, e.g. cooking demonstrations, homemade toys and encouraging  
454 learning activities when involving children in everyday chores. Whenever possible, getting fathers  
455 more involved in care as well as generally widening the circle of care may make a big difference to  
456 enabling children to grow and develop better.

457

458 Earlier studies suggest various intervention strategies and programme models, which can be used to  
459 deliver parenting interventions and achieve improved ECD (Jeong *et al.*, 2021). In particular,  
460 interventions provided early and more intensively (e.g. weekly) with supportive supervision may be  
461 most effective (Aboud *et al.*, 2018). The majority (70%) of published effective parenting  
462 interventions last at least 12 months (Jeong *et al.*, 2021) although several meta-analyses have shown

463 no significant correlations between programme duration and ECD outcomes (Jeong *et al.*, 2021;  
464 Sanders *et al.*, 2014) or between more parent contacts and larger effect sizes (Engle *et al.*, 2011).

465

## 466 **Strengths and limitations**

467 Our findings derive directly from caregivers and professionals who work with ECD or whose children  
468 have SAM in Mwanza, Tanzania. These may be of relevance for other low-income settings, especially  
469 in sub-Saharan African countries. We are aware that the issues raised may be subject to some degree  
470 of social desirability bias, and the reported practices and perceptions may not necessarily correspond  
471 to actual behaviours. We hope that this study may shed light on some issues that could be addressed  
472 in creating stronger support for children to thrive if provided with both nutritional and PS support in  
473 a programme embedded with a clear understanding of the wider social and structural issues which  
474 affect the care of a child admitted to the nutrition unit. Our qualitative approach has allowed us to  
475 gain a nuanced perspective on barriers for learning and development in young children by gaining  
476 points of view from both caregivers and professionals which we can share and learn from.  
477 Additionally, inclusion of professionals working at different levels within the hospital and at different  
478 NGOs contributed to a broader variety of perspectives.

479

## 480 **Conclusions**

481 Based on the barriers, facilitators and suggestions we identified, we found that a context-relevant  
482 PS programme to improve child development among young children treated for SAM in Tanzania  
483 should include better linkage with community workers on discharge from the nutrition unit,  
484 education of caregivers to improve awareness of nutrition and PS, and involvement of fathers to  
485 widen the circle of care and decrease the burden on mothers. Specific recommendations from  
486 professionals on counselling of caregivers which could be useful in everyday scenarios included  
487 cooking demonstrations, homemade toys and encouraging learning activities by involving children

488 in everyday chores. Other issues identified were structural, highlighting the continued need for  
489 other types of programmes to target food and financial insecurity.

490

### 491 **Acknowledgements**

492 The authors would like to thank the interviewees who took time to participate in this study and  
493 share their views and thoughts with us. We would also like to acknowledge the healthcare staff at  
494 the Bugando Medical Centre nutrition unit, who helped sampling and identifying the caregivers for  
495 interviews, as well as the staff at the National Institute for Medical Research, who also participated  
496 in this study.

497

498

## 499 **References**

- 500 Abessa, T. G., Bruckers, L., Kolsteren, P., & Granitzer, M. (2017). Developmental performance of  
501 hospitalized severely acutely malnourished under-six children in low- income setting. *BMC*  
502 *Pediatrics*, 17(1), 1–10. <https://doi.org/10.1186/s12887-017-0950-5>
- 503 Abessa, T. G., Worku, B. N., Wondafrash, M., Girma, T., Valy, J., Lemmens, J., Bruckers, L.,  
504 Kolsteren, P. & Granitzer, M. (2019). Effect of play-based family-centered  
505 psychomotor/psychosocial stimulation on the development of severely acutely malnourished  
506 children under six in a low-income setting: a randomized controlled trial. *BMC Pediatrics*,  
507 19(336). <https://doi.org/10.1186/s12887-019-1696-z>
- 508 Aboud, F. E., Yousafzai, A. K. & Nores, M. (2018). State of the science on implementation  
509 research in early child development and future directions. *Ann. N. Y. Acad. Sci.*, 1419(1), 264-  
510 271. <https://doi-org.ep.fjernadgang.kb.dk/10.1111/nyas.13722>
- 511 Ahmed, M. M., Hokororo, A., Kidenya, B. R., Kabyemera, R. & Kamugisha, E. (2016). Prevalence  
512 of undernutrition and risk factors of severe undernutrition among children admitted to  
513 Bugando Medical Centre in Mwanza, Tanzania. *BMC Nutrition*, 2(49). [https://doi-](https://doi-org.ep.fjernadgang.kb.dk/10.1186/s40795-016-0090-6)  
514 [org.ep.fjernadgang.kb.dk/10.1186/s40795-016-0090-6](https://doi-org.ep.fjernadgang.kb.dk/10.1186/s40795-016-0090-6)
- 515 Ashworth, A., Khanum, S., Jackson, A., & Schofield, C. (2003). Guidelines for the inpatient  
516 treatment of severely malnourished children. *World Health Organization*, 1–48. Retrieved  
517 from <http://www.who.int/nutrition/publications/severemalnutrition/9241546093/en/>
- 518 Attanasio, O. P., Fernández, C., Fitzsimons, E. O. A., Grantham-McGregor, S. M., Meghir, C.,  
519 Rubio-Codina, M. (2014). Using the infrastructure of a conditional cash transfer program to  
520 deliver a scalable integrated early child development program in Colombia: cluster randomized  
521 controlled trial. *BMJ*, 349, 5785. <https://doi-org.ep.fjernadgang.kb.dk/10.1136/bmj.g5785>
- 522 Bahwere, P., Binns, P., Collins, S., Dent, N., Guerrero, S., Hallam, A., Khara, T., Lee, J., Mollison,  
523 S., Myatt, M., Saboya, M., Sadler, K. & Walsh, A. (2006). Community-based Therapeutic  
524 Care (CTC): A Field Manual. First edition, Valid International, Oxford, UK.

- 525 Black, M. M., Walker, S. P., Fernald, L. C. H., Andersen, C. T., DiGirolamo, A. M., Lu, C.,  
526 McCoy, D. C., Fink, G., Shawar, Y. R., Shifmann, J., Devercelli, A. E., Wodon, Q. T., Vargas-  
527 Barón, E., Grantham-McGregor, S. (2017). Early childhood development coming of age:  
528 science through the life course. *The Lancet*, 389(10064), 77-90. [https://doi.org/10.1016/S0140-](https://doi.org/10.1016/S0140-6736(16)31389-7)  
529 [6736\(16\)31389-7](https://doi.org/10.1016/S0140-6736(16)31389-7)
- 530 Campbell, S., Greenwood, M., Prior, S., Shearer, T., Walkem, K., Young, S., Bywaters, D. &  
531 Walker, K. (2020). Purposive sampling: complex or simple? Research case examples. *Journal*  
532 *of Research in Nursing*, 25(8), 652-661. <https://doi.org/10.1177/1744987120927206>
- 533 Cavallera, V., Tomlinson, M., Radner, J., Coetzee, B., Daelmans, B., Hughes, R., Pérez-Escamilla,  
534 R., Silver, K., L. & Dua, T. (2019). Scaling early child development: what are the barriers and  
535 enablers? *Archives of Disease in Childhood*, 104, 43-50.
- 536 Cuartas, J. (2021). The effect of maternal education on parenting and early childhood development:  
537 An instrumental variables approach. *Journal of Family Psychology*, 36(2), 280-290.  
538 <https://doi.org/10.1037/fam0000886>
- 539 Daniel, A. I., Bandsma, R. H., Lytvyn, L., Voskuijl, W. P., Potani, I., van den Heuvel, M. (2017).  
540 Psychosocial stimulation interventions for children with severe acute malnutrition: a  
541 systematic review. *Journal of global health*, 7(1), 1-12.
- 542 Engle, P. L., Fernald, L. C. H., Alderman, H., Behrman, J., O’Gara, C., Yousafzai, A., Cabral de  
543 Mello, M., Hidrobo, M., Ulkuer, N., Ertem, I., Iltus, S. & the Global Child Development  
544 Steering Group (2011). Strategies for reducing inequalities and improving developmental  
545 outcomes for young children in low- and middle-income countries. *The Lancet*, 378(9799),  
546 1339-53. [https://doi.org/10.1016/S0140-6736\(11\)60889-1](https://doi.org/10.1016/S0140-6736(11)60889-1)
- 547 Evans, D. K., Holtemeyer, B. & Kosec, K. (2019). Cash Transfers and Health: Evidence from  
548 Tanzania. *The World Bank Economic Review*, 33(2), 394–412.  
549 <https://doi.org/10.1093/wber/lhx001>
- 550 Fernald, L. C. H., Weber, A., Galasso, E. & Ratsifandrihamanana (2011). Socioeconomic gradients

- 551 and child development in a very low income population: evidence from Madagascar.  
552 *Developmental Science*, 14(4), 832-847.
- 553 Fernald, L. C. H. & Gunnar, M. R. (2009). Poverty-alleviation program participation and salivary  
554 cortisol in very low-income children. *Social Science & Medicine*, 68(12), 2180-89.  
555 <https://doi.org/10.1016/j.socscimed.2009.03.032>
- 556 Feinstein, S., Feinstein, R. & Sabrow, S. (2010). Gender Inequality in the Division of Household  
557 Labour in Tanzania. *African Sociological Review*, 14(2), 98-109.
- 558 Fusch, P. I. & Ness, L. R. (2015). Are We There Yet? Data Saturation in Qualitative Research. *The*  
559 *Qualitative Report*, 20(9), 1408-1416. <https://doi.org/10.46743/2160-3715/2015.2281>
- 560 Gale, N. K., Heath, G., Cameron, E., Rashid, S. & Redwood, S. (2013). Using the framework  
561 method for the analysis of qualitative data in multi-disciplinary health research. *BMC Medical*  
562 *Research Methodology*, 13(1), 1–8. <https://doi.org/10.1186/1471-2288-13-117>
- 563 Gelli, A., Margolies, A., Santacroce, M., Roschnik, N., Twalibu, A., Katundu, M., Moestue, H.,  
564 Alderman, H. & Ruel, M. (2018). Using a Community-Based Early Childhood Development  
565 Center as a Platform to Promote Production and Consumption Diversity Increases Children's  
566 Dietary Intake and Reduces Stunting in Malawi: A Cluster-Randomized Trial. *J Nutr*, 148(10),  
567 1587-1597. <https://doi-org.ep.fjernadgang.kb.dk/10.1093/jn/nxy148>
- 568 Grantham-McGregor, S., Schofield, W., & Powell, C. (1987). Development of severely  
569 malnourished children who received psychosocial stimulation six-year follow-up. *Pediatrics*,  
570 79(2), 247–254.
- 571 Grantham-McGregor, S., Schofield, W. N., & Stewart, M. E. (1980). Effect of long-term  
572 psychosocial stimulation on mental development of severely malnourished children. *The*  
573 *Lancet*, discharge. 15,16, 785–789.
- 574 Guest, G., Namey, E. & Mitchell, M. (2013). In-depth interviews. In *Collecting qualitative data*  
575 (pp. 113-171). SAGE Publications, Ltd, <https://dx.doi.org/10.4135/9781506374680.n4>
- 576 Hamadani, J. D., Mehrin, S. F., Tofail, F., Hasan, M. I., Huda, S. N., Baker-Henningham, H.,



- 577 Ridout, D., & Grantham-McGregor, S. (2019). Integrating an early childhood development  
578 programme into Bangladeshi primary health-care services: an open-label, cluster-randomised  
579 controlled trial. *The Lancet Global Health*, 7(3), e366–75. [https://doi.org/10.1016/S2214-](https://doi.org/10.1016/S2214-109X(18)30535-7)  
580 109X(18)30535-7
- 581 Hasan, M. T., Magalhaes, R. J. S., Williams, G. M. & Mamun A. A. (2016). The role of maternal  
582 education in the 15-year trajectory of malnutrition in children under 5 years of age in  
583 Bangladesh. *Maternal & child nutrition*, 12(4), 929-39. <https://doi.org/10.1111/mcn.12178>
- 584 Ijaz, M. K., & Rubino, J. R. (2012). Impact of infectious diseases on cognitive development in  
585 childhood and beyond: Potential mitigational role of hygiene. *Open Infectious Diseases*  
586 *Journal*, 6(1), 65–70. <https://doi.org/10.2174/1874279301206010065>
- 587 Jeong, J., Franchett, E. E., Ramos de Oliveira, C. V., Rehmani, K. & Yousafzai, A. K. (2021).  
588 Parenting interventions to promote early child development in the first three years of life: A  
589 global systematic review and meta-analysis. *PLOS Medicine*, 18(5), e1003602.
- 590 Jeong, J., McCoy, D. C., Yousafzai, A. K., Salhi, C. & Fink, G. (2016). Paternal Stimulation and  
591 Early Child Development in Low- and Middle-Income Countries. *Pediatrics*, 138(4),  
592 e20161357.
- 593 Kirolos, A., Goyheneix, M., Kalmus Eliaz, M., Chisala, M., Lissauer, S., Gladstone, M. & Kerac,  
594 M. (2022). Neurodevelopmental, cognitive, behavioural and mental health impairments  
595 following childhood malnutrition: a systematic review. *BMJ Global Health*, 7.  
596 <https://doi.org/10.1136/bmjgh-2022-009330>
- 597 Mehrin, S. F., Hamadani, J. D., Salveen, N.-E., Hasan, M. I., Hossain, S. J. & Baker-Henningham,  
598 H. (2021). Adapting an evidence-based, early childhood parenting programme for integration  
599 into government primary health care services in rural Bangladesh. *Frontiers in Public Health*,  
600 8, 1052. <https://doi.org/10.3389/fpubh.2020.608173>
- 601 Mehrin, S. F., Hasan, M. I., Tofail, F., Shiraji, S., Ridout, D., Grantham-McGregor, S., Hamadani,  
602 J. D. & Baker-Henningham, H. (2022). Integrating a Group-Based, Early Childhood Parenting

603 Intervention into Primary Health Care Services in Rural Bangladesh: A Cluster-Randomised  
604 Controlled Trial. *Frontiers in Pediatrics*, 10. <https://doi.org/10.21203/rs.3.rs-1393282/v1>.  
605 Ministry of Health, Community Development, Gender, Elderly and Children (MoHCDGEC)  
606 [Tanzania Mainland], Ministry of Health (MoH) [Zanzibar], National Bureau of Statistics  
607 (NBS), Office of the Chief Government Statistician (OCGS), and ICF (2016). *Tanzania*  
608 *Demographic and Health Survey and Malaria Indicator Survey (TDHS-MIS) 2015-16*. Dar es  
609 Salaam, Tanzania, and Rockville, Maryland, USA: MoHCDGEC, MoH, NBS, OCGS, and  
610 ICF.

611 Nahar, B., Hossain, M. I., Hamadani, J. D., Ahmed, T., Huda, S. N., Grantham-McGregor, S. M., &  
612 Persson, L. A. (2012). Effects of a community-based approach of food and psychosocial  
613 stimulation on growth and development of severely malnourished children in Bangladesh: a  
614 randomised trial. *Eur J Clin Nutr*, 66, 701–709.

615 Population Stat (2022). Mwanza Tanzania Population. Available from:  
616 <https://populationstat.com/tanzania/mwanza> [Accessed 16-11-2022].

617 Ramanadhan, S., Revette, A. C., Lee, R. M. & Aveling, E. L. (2021). Pragmatic approaches to  
618 analyzing qualitative data for implementation science: an introduction. *Implementation Science*  
619 *Communications*, 2(70). doi:10.1186/s43058-021-00174-1

620 Richter, L. M., Daelmans, B., Lombardi, J., Heymann, J., Boo, F. L., Behrman, J. R., Lu, C., Lucas,  
621 J. E., Perez-Escamilla, R., Dua, T., Bhutta, Z. A., Stenberg, K., Gertler, P. & Darmstadt, G. L.  
622 (2017). Investing in the foundation of sustainable development: pathways to scale up for early  
623 childhood development. *Lancet*, 389(10064): 103-118.

624 Sanders, M. R., Kirby, J. N., Tellegen, C. L. & Day, J. J. (2014). The Triple P-Positive Parenting  
625 Program: A systematic review and meta-analysis of a multi-level system of parenting support.  
626 *Clin Psychol Rev*, 34(4), 337–57. <https://doi.org/10.1016/j.cpr.2014.04.003>

627 Saunders, B., Sim, J., Kingstone, T., Baker, S., Waterfield, J., Bartlam, B., Burroughs, H. & Jinks,  
628 C. Saturation in qualitative research: exploring its conceptualization and operationalization.

- 629 *Qual Quant*, 52(4), 1893-1907. doi: 10.1007/s11135-017-0574-8. Epub 2017 Sep 14.
- 630 Sudfeld, C. R., McCoy, D. C., Danaei, G., Fink, G., Ezzati, M., Andrews, K. G., & Fawzi, W. W.  
631 (2015). Linear growth and child development in low- and middle-income countries: A meta-  
632 analysis. *Pediatrics*, 135(5), e1266–e1275. <https://doi.org/10.1542/peds.2014-3111>
- 633 van den Heuvel, M., Voskuil, W., Chidzalo, K., Kerac, M., Reijneveld, S. A., Bandsma, R., &  
634 Gladstone, M. (2017). Developmental and behavioural problems in children with severe acute  
635 malnutrition in Malawi: A cross-sectional study. *Journal of Global Health*, 7(2).  
636 <https://doi.org/10.7189/jogh.07.020416>
- 637 WHO & UNICEF (2012). Care for Child Development Participant Manual. *Care for Child*  
638 *Development Improving the Care of Young Children*, 50
- 639 WHO, UNICEF & World Bank Group (2018). Nurturing care for early childhood development: a  
640 framework for helping children survive and thrive to transform health and human potential.  
641 Geneva: WHO, Licence: CC BY-NC-SA 3.0 IGO.
- 642 Yousafzai, A. K., Rasheed, M. A., Rizvi, A., Armstrong, R., & Bhutta, Z. A. (2014). Effect of  
643 integrated responsive stimulation and nutrition interventions in the Lady Health Worker  
644 programme in Pakistan on child development, growth, and health outcomes: a cluster-  
645 randomised factorial effectiveness trial. *Lancet*, 384(9950), 1282-93. doi: 10.1016/S0140-  
646 6736(14)60455-4. Epub 2014 Jun 16. PMID: 24947106.
